# Supplementary material for: TEMPO-mediated oxidized nanocellulose incorporating with its derivatives of carbon dots for luminescent hybrid films
Source: Royal Society of Chemistry journal article supplement (doi:10.1039/c5ra17242j), 2015-12-28
Supplement: c5ra17242j1.pdf [file c5ra17242j1.pdf]

## **Electronic Supplementary Information**

# **TEMPO-mediated oxidized nanocellulose incorporating with its derivatives of carbon dots for luminescent hybrid films**

Yaoquan Jiang,<sup>a</sup> Yafei Zhao,<sup>a</sup> Xin Feng,<sup>\*a</sup> Jianhui Fang<sup>b</sup> and Liyi Shi<sup>a</sup>

<sup>a</sup>Research Center of Nano Science and Technology, Shanghai University, Shanghai 200444, P. R.  
China

<sup>b</sup>Department of Chemistry, College of Science, Shanghai University, Shanghai 200444, P. R.  
China

\*Corresponding Author: [fengxin@shu.edu.cn](mailto:fengxin@shu.edu.cn)

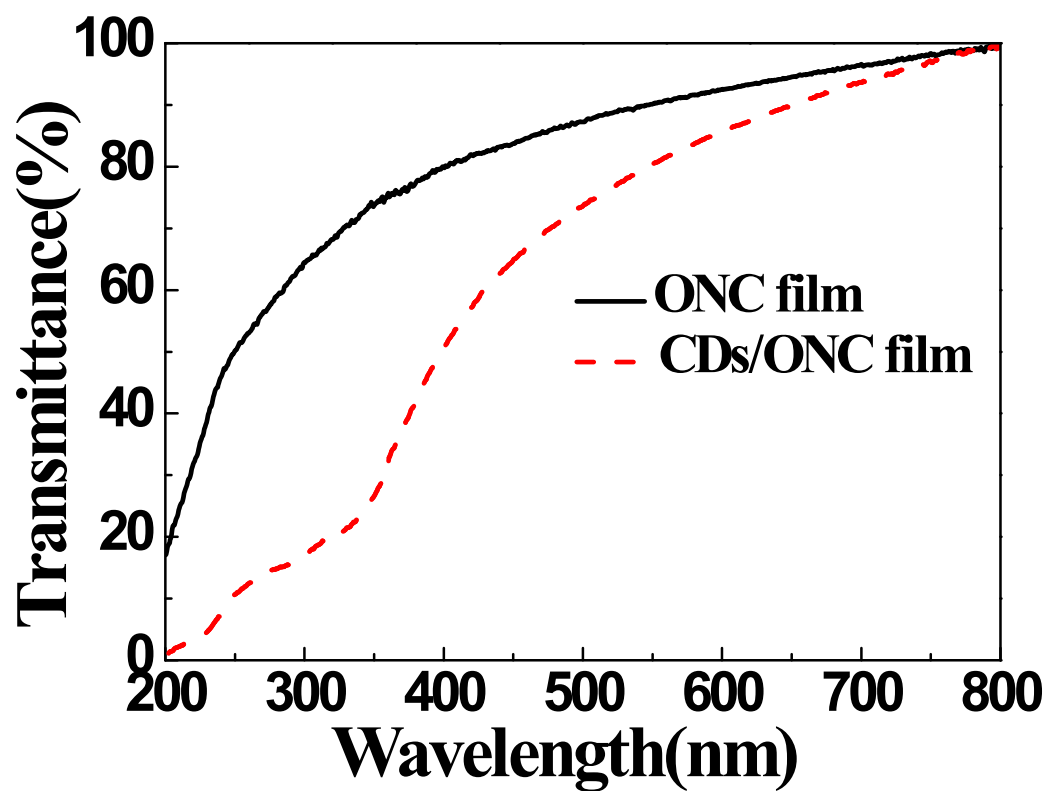

Figure S1. UV-vis spectra of ONC film and CDs/ONC hybrid film.

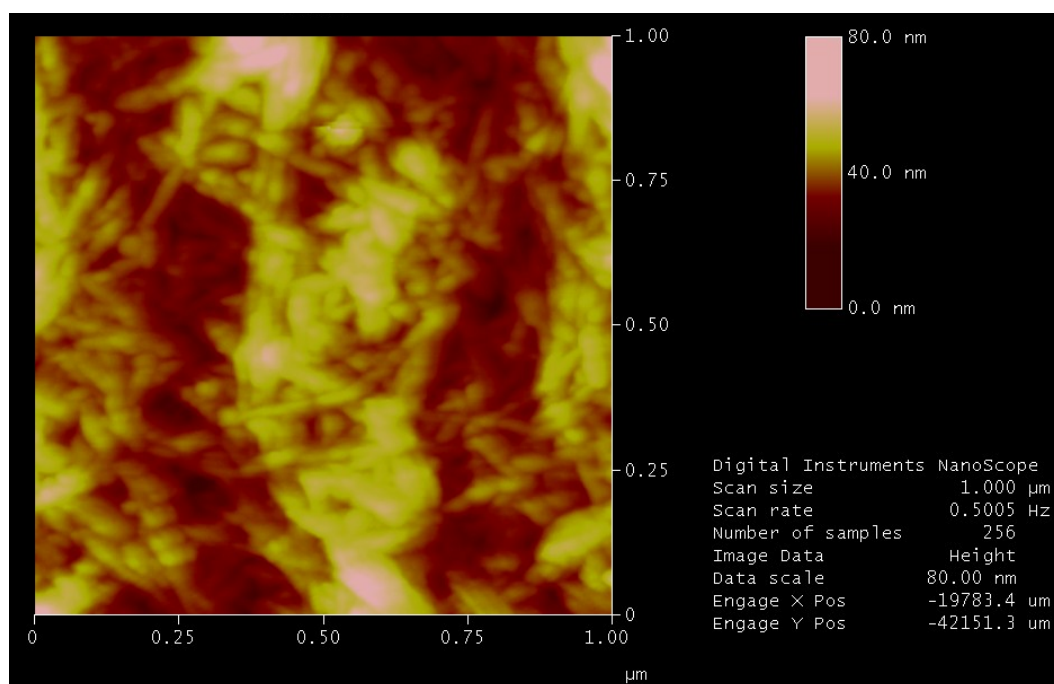

Figure S2. AFM image of CDs/ONC hybrid film.

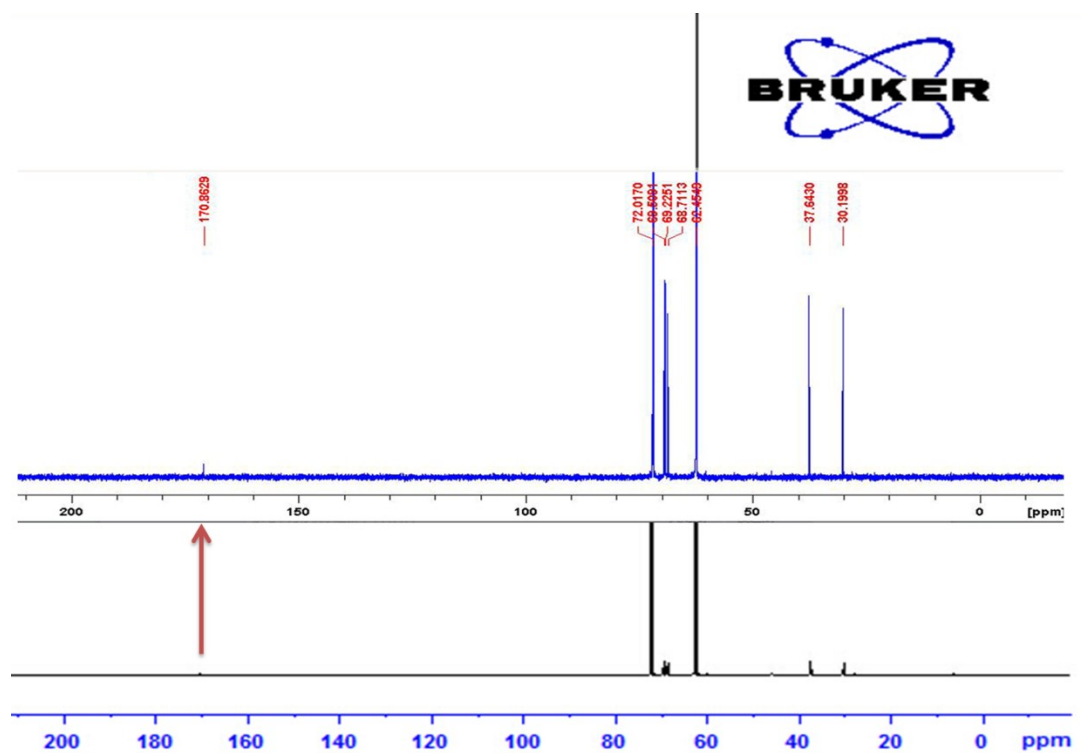

Figure S3.  $^{13}\text{C}$ -NMR spectrum of CDs/ONC.

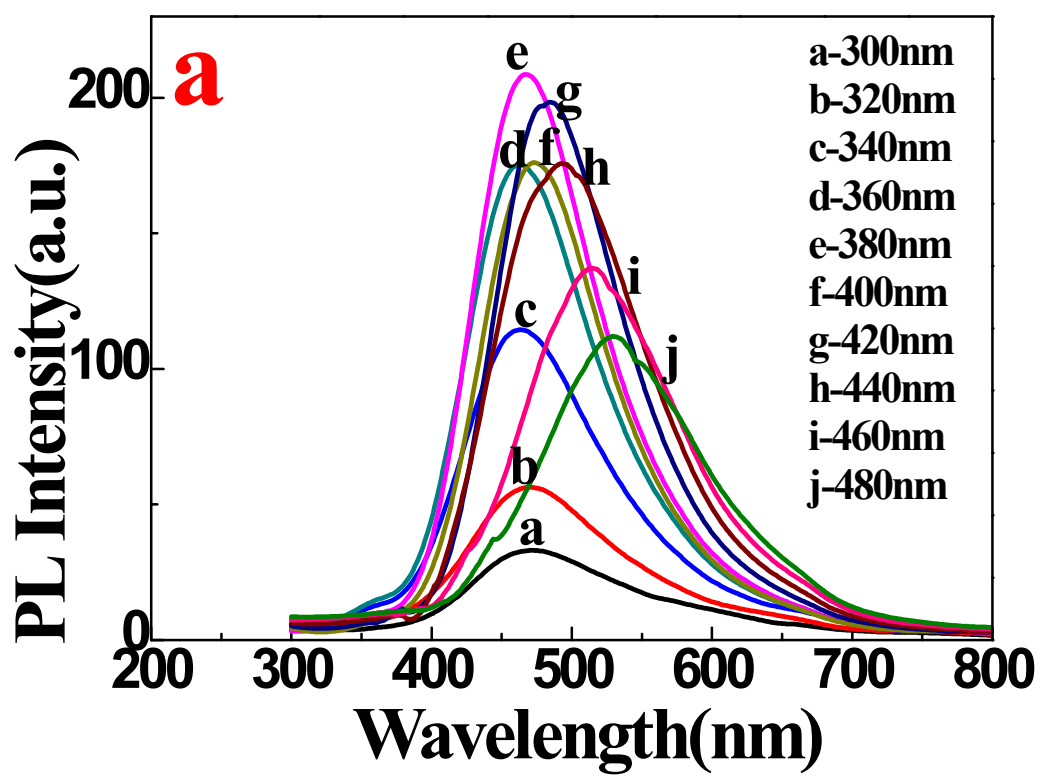

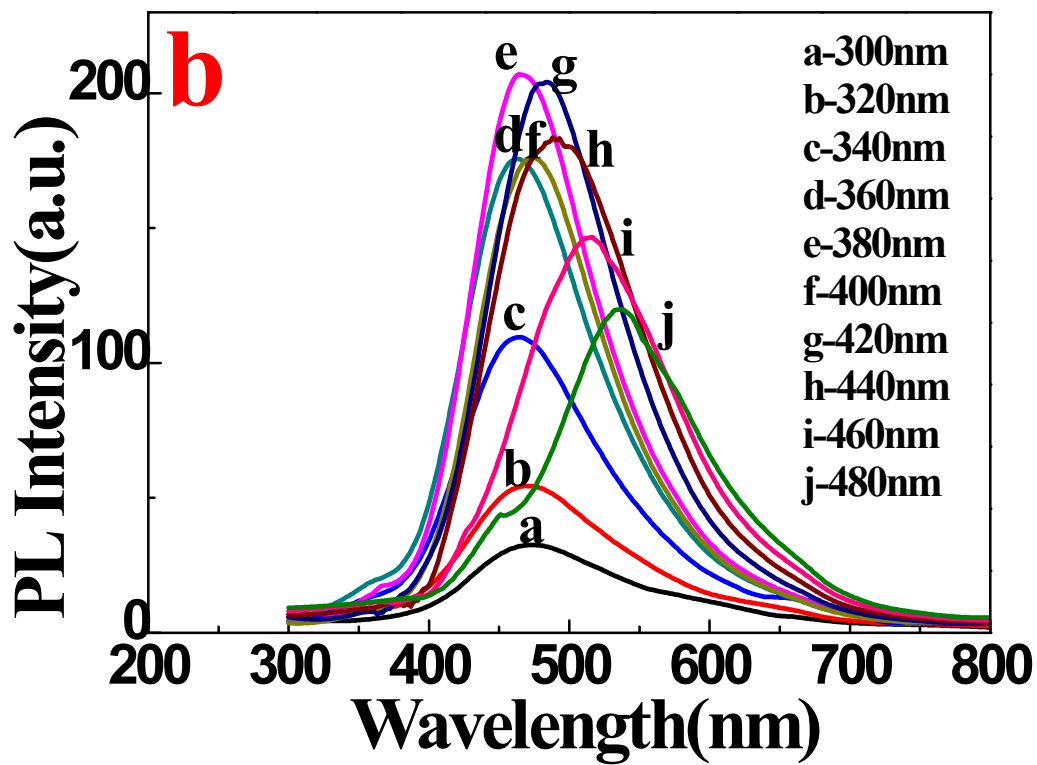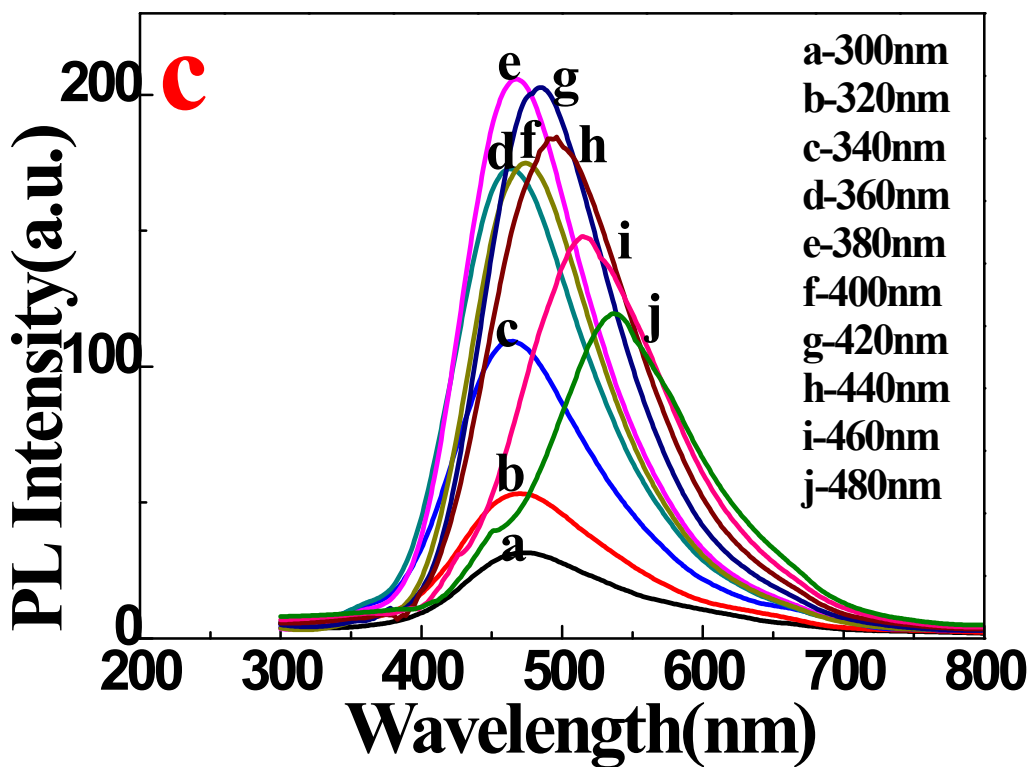

Figure S4. Photoluminescence emission spectra of CDs/ONC hybrid film after bending for (a) 500, (b) 1000 and (c) 2000 times.
